# Supplementary material
Source: PubMed Central journal article supplement (PMC9379603)
Supplement: sj-pdf-1-ebm-10.1177_15353702221090181.pdf [file sj-pdf-1-ebm-10.1177_15353702221090181.pdf]

**Table S1** – The cost breakdown of the materials and reagents for self-saliva collection kit and CRISPR-Cas12a-based assay

| Materials and reagents               | Cost per sample (USD) |
|--------------------------------------|-----------------------|
| Saliva collection kit                | \$1                   |
| RNA extraction                       | \$6                   |
| Reverse transcription                | \$6                   |
| Recombinase polymerase amplification | \$5                   |
| CRISPR-Cas12a-based assay            | \$1                   |
| Others (plastic ware + personnel)    | \$1                   |
| <b>Total</b>                         | <b>\$20</b>           |

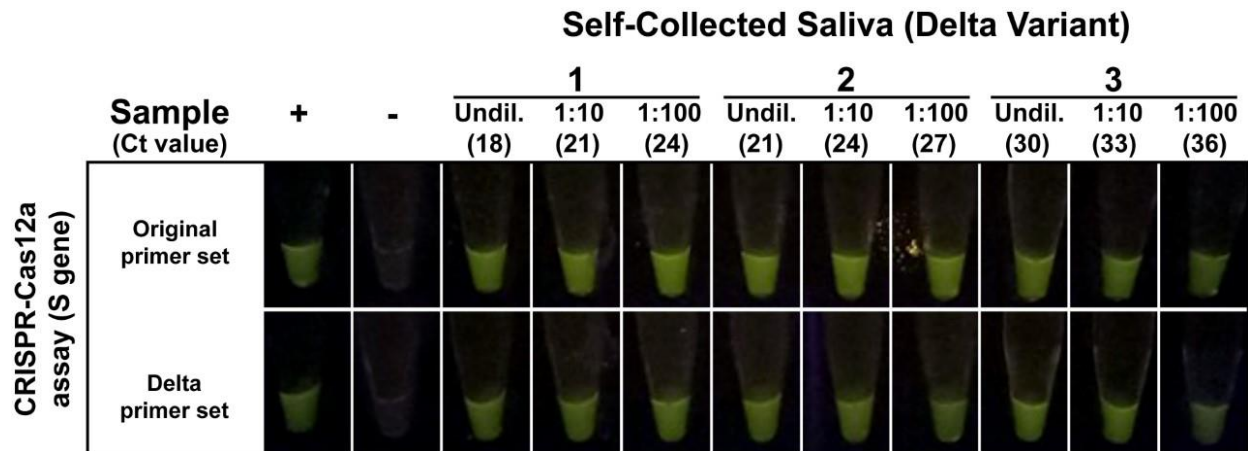

**Figure S1** – The results of CRISPR-Cas12a-based assay (original and Delta strain primer sets) tested with different dilutions of COVID-19 positive saliva samples are shown. The representative samples contain different Ct values based on qRT-PCR as 18, 21 and 30 for samples 1, 2 and 3, respectively. The 1:10 and 1:100 diluted samples were derived from 10-fold serial dilutions with DEPC-treated water. The estimated Ct values of all dilutions are shown in the parenthesis. (Undil. = undiluted)
